# Supplementary material for: Size distribution and particle morphology of analytes dried through the Evaporative Light Scattering Detector: Part A
Source: Copernicus journal article supplement (doi:10.5194/ar-2025-35), 2025-11-18
Supplement: Supplementary file [file ar-2025-35-RC1-supplement.pdf]

The manuscript makes a significant contribution to this enduring field of research.

Particles are a key topic in science [1]. Aerosols are a major source of disease, yet few realize their spread is largely determined by physics.

Recent studies on particles focus on the risks associated with their release, allowing for a more nuanced evaluation of both their advantages and disadvantages. Numerous researchers also highlight the emission of submicron and nanometric particles [2]. Other studies on larger particles indicate different strategies [3-5].

The manuscript is well-organized and clear. A native English speaker should review grammar and vocabulary. Add references on real-life particle emission, including sources from this journal or mentioned in this review, to improve the article. Below are my observations from the manuscript.

Title: The title appropriately reflects the scope and subject of the contribution.

A graphical abstract visually summarizes an article's main findings, ideally as a standalone figure for quick comprehension. To enhance clarity, ensure it is both engaging and self-explanatory.

Highlights are short bullet points summarizing key results; make each highlight clear and self-sufficient.

Abstracts should succinctly state the research objective, the need for further study, and relevant results to avoid vagueness.

The introduction effectively moves from general context to the specific topic, covering background, purpose, methodology, potential outcomes, and structure. Briefly mention various release scenarios in the risk analysis framework for completeness.

Conclusions summarize main points and supporting evidence.

## References

1. Bressot C, Meunier L, Dutouquet C. Particle emissions study from tire sample with nano-silver tracer from different steps of its life cycle. A new approach to trace emissions of tire microparticles. *Sci Total Environ*. 2025;959:178221. doi: 10.1016/j.scitotenv.2024.178221.
2. Shandilya N, Le Bihan O, Bressot C, Morgeneyer M. Evaluation of the particle aerosolization from n-tio2 photocatalytic nanocoatings under abrasion. *Journal of Nanomaterials*. 2014;Article ID 185080:11 pages. doi: <http://dx.doi.org/10.1155/2014/185080>.
3. Xiang MQ, Aguerre-Chariol O, Morgeneyer M, Philippe F, Liu Y, Bressot C. Uncertainty assessment for the airborne nanoparticle collection efficiency of a TEM grid-equipped sampling system by Monte-Carlo calculation. *Advanced Powder Technology*. 2021;32(5):1793-801. doi: 10.1016/j.apt.2021.03.033.
4. Philippe F, Xiang M, Morgeneyer M, Chen Y., Berthelot B, Charles P, et al. Representativeness of airborne brake wear emission for the automotive industry: A review. *Proc IMechE, Part D: Journal of Automobile Engineering*. 2020. doi: 10.1177/0954407021993011.
5. Xiang M, Morgeneyer M, Aguerre-Chariol O, Philippe F, Bressot C. Airborne nanoparticle collection efficiency of a TEM grid-equipped sampling system. *Aerosol Science and Technology*. 2021;55(5):526-38. doi: 10.1080/02786826.2020.1870923.
